# Supplementary material for: Superior Survival with Allogeneic Hematopoietic Stem Cell Transplantation versus Chemotherapy for High-Risk Adult Acute Lymphoblastic Leukemia in PDT-ALL-2016 Pediatric-Inspired Cohort
Source: Research Square preprint supplement (doi:10.21203/rs.3.rs-4008818/v1), 2024-03-07
Supplement: Supplementary file 1 [file 472b52dccfca0f063b3e7a16.docx]

|  | **Table S1. Clinical outcomes between MRD negative or positive subgroups.** | | | | |  |
| --- | --- | --- | --- | --- | --- | --- |
|  |  | **3-year OS** | **3-year EFS** | **3-year CIR** | **3-year NRM** |  |
|  | **MRD3 -** |  |  |  |  |  |
|  | *HSCT* | 82.1 (74.2-90.8) | 75.5 (66.9-85.2) | 11.2 (5.70-18.7) | 10.2 (5.0-17.7) |  |
|  | *CT* | 63.2 (50.6-78.9) | 51.2 (38.9-67.3) | 42.6 (28.5-56.0) | 2.0 (0.2-9.4) |  |
|  | *P* | 0.030 | 0.010 | 0.001 | 0.040 |  |
|  | **MRD3 +** |  |  |  |  |  |
|  | *HSCT* | 69.8 (59.3-82.2) | 60.1 (48.8-74.0) | 15.7 (8.0-25.7) | 16.6 (8.4-27.2) |  |
|  | *CT* | 36.7 (23.5-57.4) | 19.2 (9.30-39.6) | 72.3 (51.0-85.5) | 5.3 (0.9-15.9) |  |
|  | *P* | 0.001 | 0.001 | 0.001 | 0.190 |  |
|  | Abbreviations: OS, Overall survival; EFS, Event-free survival; CIR, Cumulative incidence of relapse; NRM, Non-relapse mortality a; HSCT, Hematopoietic stem cell transplantation; CT, Chemotherapy; MRD, Minimal residual disease. | | | | |  |
