# Supplementary material for: Superior Survival with Allogeneic Hematopoietic Stem Cell Transplantation versus Chemotherapy for High-Risk Adult Acute Lymphoblastic Leukemia in PDT-ALL-2016 Pediatric-Inspired Cohort
Source: Research Square preprint supplement (doi:10.21203/rs.3.rs-4008818/v1), 2024-03-07
Supplement: Supplementary file 2 [file 4df24e9c1917687e339277ce.docx]

|  | **Table S2. Multivariate analysis for MRD negative subgroup.** | | | | | |  |
| --- | --- | --- | --- | --- | --- | --- | --- |
|  |  | **Number** | **EFS** | **OS** | **CIR** | **NRM** |  |
|  | **Age** |  |  |  |  |  |  |
|  | ≥35 | 57 (40.7%) | Ref | | | |  |
|  | ＜35 | 83 (59.3%) | 0.56 (0.28-1.14, p=.111) | 0.32 (0.13-0.77, p=.012) | 0.70 (0.27-1.80, p=.462) | 0.20 (0.05-0.81, p=.023) |  |
|  | **Immuno-type** |  |  |  |  |  |  |
|  | T-ALL | 32 (22.9%) | Ref | | | |  |
|  | B-ALL | 108 (77.1%) | 2.46 (0.84-7.23, p=.102) | 1.46 (0.39-5.46, p=.578) | 2.72 (0.59-12.7, p=.202) | 1.40 (0.12-16.0, p=.791) |  |
|  | **CNSL at presentation** |  |  |  |  |  |  |
|  | No | 132 (94.3%) | Ref | | | |  |
|  | Yes | 8 (5.7%) | 2.14 (0.62-7.44, p=.229) | 2.56 (0.56-11.67, p=.226) | 4.13 (0.52-33.2, p=.182) | NA |  |
|  | **High WBC a** |  |  |  |  |  |  |
|  | No | 82 (58.6%) | Ref | | | |  |
|  | Yes | 58 (41.4%) | 0.86 (0.45-1.65, p=.651) | 0.66 (0.30-1.46, p=.308) | 1.00(0.36-2.76, p=.997) | 0.45 (0.12-1.66, p=.230) |  |
|  | **Cytogenetic features** |  |  |  |  |  |  |
|  | Normal | 85 (60.7%) | Ref | | | |  |
|  | Ph | 38 (27.1%) | 1.21 (0.54-2.70, p=.642) | 1.89 (0.67-5.29, p=.228) | 1.07 (0.33-3.40, p=.920) | 3.50 (0.54-22.5, p=.191) |  |
|  | MLL | 7 (5.0%) | 1.72 (0.44-6.77, p=.439) | 3.28 (0.72-15.00, p=.126) | 2.17 (0.30-15.7, p=.451) | NA |  |
|  | E2A | 3 (2.1%) | 2.74 (0.62-12.16, p=.186) | 1.81 (0.22-14.98, p=.581) | 3.07 (0.45-21.1, p=.255) | NA |  |
|  | IGHdel | 7 (5.0%) | 1.94 (0.56-6.77, p=.299) | 4.25 (1.11-16.34, p=.035) | 3.33 (1.01-10.9, p=.047) | 2.84 (0.38-21.3, p=.312) |  |
|  | **CK** |  |  |  |  |  |  |
|  | No | 127 (90.7%) | Ref | | | |  |
|  | Yes | 13 (9.3%) | 0.22 (0.03-1.71, p=.149) | 0.39 (0.05-3.15, p=.377) | NA | 0.34 (0.02-4.97, p=.430) |  |
|  | **Allo-HSCT** |  |  |  |  |  |  |
|  | No | 51 (36.4%) | Ref | | | |  |
|  | Yes | 89 (63.6%) | 0.41 (0.22-0.76, p=.005) | 0.42 (0.20-0.90, p=.025) | 0.13 (0.06-0.26, p<.001) | 7.91 (0.93-67.2, p=.058) |  |
|  | **Ph-like** |  |  |  |  |  |  |
|  | No | 120 (85.7%) | Ref | | | |  |
|  | Yes | 20 (14.3%) | 2.53 (1.08-5.93, p=.033) | 2.49 (0.77-8.08, p=.128) | 3.75 (1.13-12.4, p=.031) | 1.45 (0.14-15.1, p=.751) |  |
|  | **IKZF1mut/del** |  |  |  |  |  |  |
|  | No | 118 (84.3%) | Ref | | | |  |
|  | Yes | 22 (15.7%) | 1.39 (0.65-2.97, p=.399) | 1.88 (0.75-4.73, p=.180) | 0.96 (0.26-3.52, p=.952) | 2.24 (0.51-9.89, p=.292) |  |
|  | Abbreviations: CNSL, central nervous system leukemia; WBC, white blood cell; Ph+, Philadelphia chromosome positive; MLLr, MLL rearrangement; E2Ar, E2A rearrangement; CK, complex karyotype; OS, Overall survival; EFS, Event-free survival; CIR, Cumulative incidence of relapse; NRM, Non-relapse mortality a, For B-ALL, WBC＞30×109/L; for T-ALL, WBC＞ 100×109/L. | | | | | |  |
