# Supplementary material for: Superior Survival with Allogeneic Hematopoietic Stem Cell Transplantation versus Chemotherapy for High-Risk Adult Acute Lymphoblastic Leukemia in PDT-ALL-2016 Pediatric-Inspired Cohort
Source: Research Square preprint supplement (doi:10.21203/rs.3.rs-4008818/v1), 2024-03-07
Supplement: Supplementary file 3 [file df5169d5c01f91f79501c1dd.docx]

|  | **Table S3. Multivariate analysis for MRD positive subgroup.** | | | | | |  |
| --- | --- | --- | --- | --- | --- | --- | --- |
|  |  | **Number** | **EFS** | **OS** | **CIR** | **NRM** |  |
|  | **Age** |  |  |  |  |  |  |
|  | ≥35 | 44 (47.8%) | Ref | | | |  |
|  | ＜35 | 48 (52.2%) | 1.31 (0.69-2.49, p=.411) | 0.82 (0.42-1.61, p=.568) | 1.24 (0.48-3.15, p=.662) | 1.27. (0.32-5.01, p=.733) |  |
|  | **Immuno-type** |  |  |  |  |  |  |
|  | T-ALL | 20 (21.7%) | Ref | | | |  |
|  | B-ALL | 72 (78.3%) | 1.52 (0.59-3.93, p=.385) | 1.44 (0.50-4.13, p=.495) | 2.15 (0.59-7.82, p=.242) | 0.49 (0.10-2.43, p=.381) |  |
|  | **CNSL at presentation** |  |  |  |  |  |  |
|  | No | 85 (92.4%) | Ref | | | |  |
|  | Yes | 7 (7.6%) | 0.58 (0.17-1.97, p=.385) | 0.68 (0.19-2.44, p=.552) | 1.14 (0.28-4.65, p=.852) | NA |  |
|  | **High WBC a** |  |  |  |  |  |  |
|  | No | 54 (58.7%) | Ref | | | |  |
|  | Yes | 38 (41.3%) | 2.81 (1.53-5.16, p=.001) | 2.16 (1.12-4.15, p=.021) | 3.79 (1.63-8.79, p=.002) | 1.16 (0.38-3.53, p=.790) |  |
|  | **Cytogenetic features** |  |  |  |  |  |  |
|  | Normal | 45 (48.9%) | Ref | | | |  |
|  | Ph | 33 (35.9%) | 0.93 (0.41-2.13, p=.863) | 1.08 (0.45-2.59, p=.864) | 1.20 (0.40-3.62, p=.740) | 0.84 (0.13-5.40, p=.861) |  |
|  | MLL | 3 (3.3%) | 1.89 (0.47-7.63, p=.368) | 3.49 (0.85-14.42, p=.084) | 2.54(0.53-12.1, p=.241) | NA |  |
|  | E2A | 4 (4.3%) | 1.14 (0.27-4.69, p=.861) | 1.34 (0.26-6.83, p=.721) | 0.44 (0.03-6.59, p=.553) | 12.9 (0.55-5.40, p=.111) |  |
|  | IGHdel | 7 (7.6%) | 0.86 (0.26-2.92, p=.813) | 0.86 (0.25-2.95, p=.814) | 0.95 (0.24-3.72, p=.957) | 0.98 (0.12-7.90, p=.992) |  |
|  | **CK** |  |  |  |  |  |  |
|  | No | 81 (88.0%) | Ref | | | |  |
|  | Yes | 11 (12.0%) | 2.46 (1.01-6.00, p=.048) | 2.01 (0.76-5.32, p=.161) | 5.55 (1.64-18.7, p=.006) | NA |  |
|  | **Allo-HSCT** |  |  |  |  |  |  |
|  | No | 34 (37.0%) | Ref | | | |  |
|  | Yes | 58 (63.0%) | 0.22 (0.10-0.45, p<.001) | 0.21 (0.10-0.43, p<.001) | 0.07 (0.03-0.181, p<.001) | 4.20 (0.55-32.2, p=.173) |  |
|  | **Ph-like** |  |  |  |  |  |  |
|  | No | 78 (84.8%) | Ref | | | |  |
|  | Yes | 14 (15.2%) | 1.93 (0.78-4.81, p=.155) | 2.78 (1.03-7.49, p=.044) | 1.61 (0.44-5.83, p=.471) | 5.33 (1.14-24.9, p=.033) |  |
|  | **IKZF1mut/del** |  |  |  |  |  |  |
|  | No | 75 (81.5%) | Ref | | | |  |
|  | Yes | 17 (18.5%) | 1.03 (0.45-2.34, p=.946) | 1.22 (0.52-2.88, p=.648) | 1.45 (0.57-3.68, p=.432) | 0.40 (0.04-4.19, p=.442) |  |
|  | Abbreviations: CNSL, central nervous system leukemia; WBC, white blood cell; Ph+, Philadelphia chromosome positive; MLLr, MLL rearrangement; E2Ar, E2A rearrangement; CK, complex karyotype; OS, Overall survival; EFS, Event-free survival; CIR, Cumulative incidence of relapse; NRM, Non-relapse mortality a, For B-ALL, WBC＞30×109/L; for T-ALL, WBC＞ 100×109/L. | | | | | |  |
